# Supplementary material
Source: publisher figshare collection journal article supplement (https://geolsoc.figshare.com/ndownloader/files/14340878)
Supplement: Supplementary file 1 [file 14340878]

## Upper Glen 1 Well

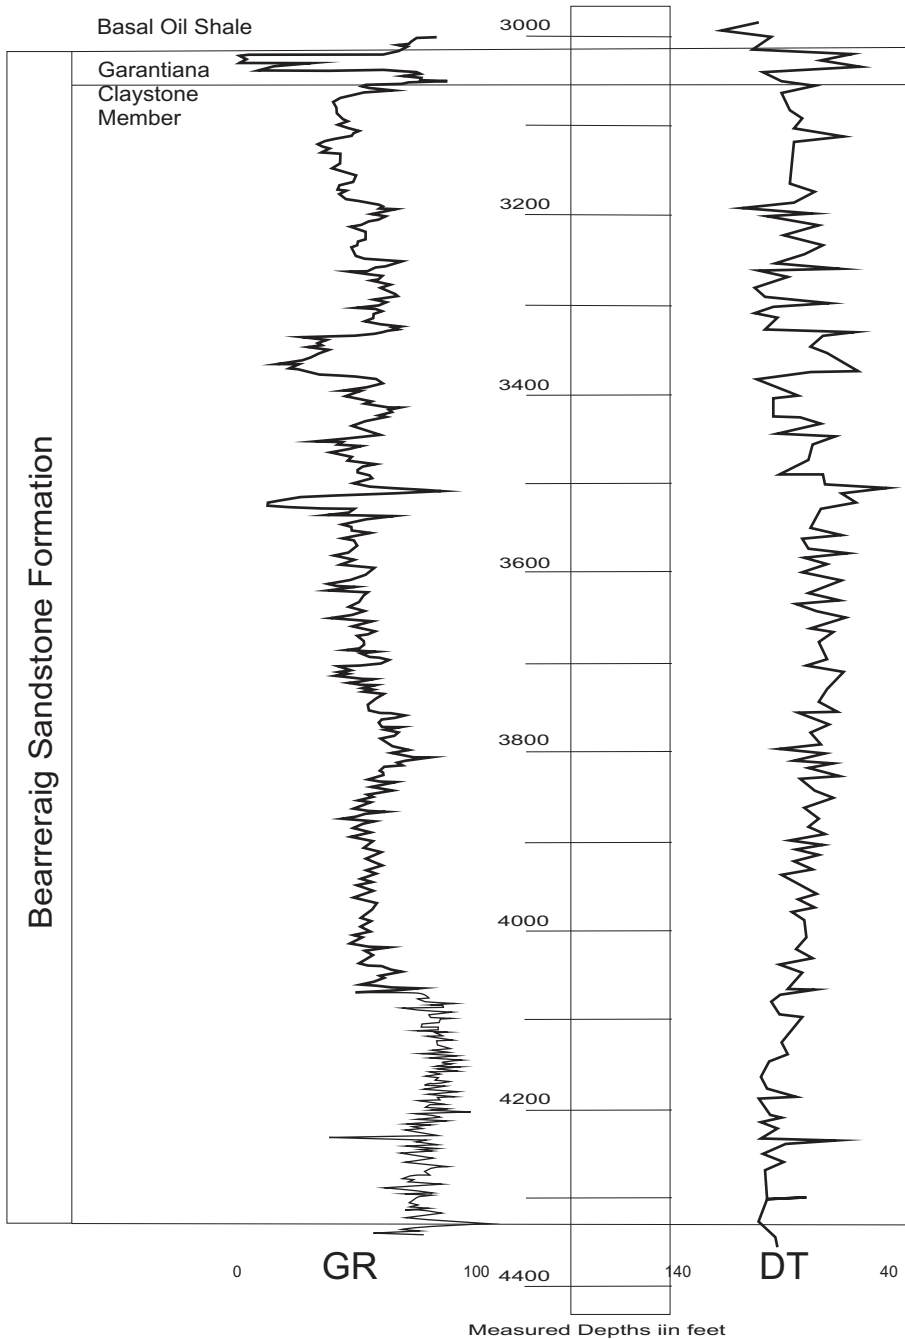

## Berreraig Bay

Stratigraphic Datum is base Garantiana Claystone Member  
 Distance between Upper Glen 1 Well and Berreraig Bay is 22 km

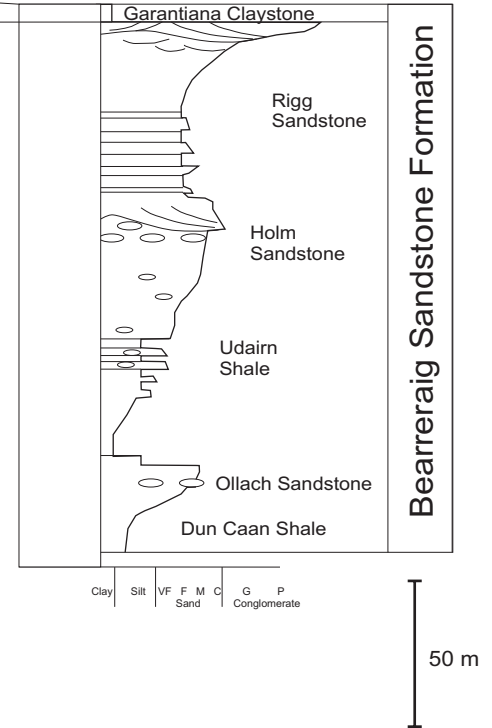

### Upper Glen 1 v Berreraig Bay Exercise

- Task 1 - Correlate the well and the outcrop
- Task 2 - Compare thicknesses of units in a table
- Task 3 - Draw lithology logs and compare lithofacies
- Task 4 - extrapolate between the wells to demonstrate how facies might change laterally
- Task 5 - Sketch on stacking patterns and deliver a sequence stratigraphic interpretation
